# Supplementary material
Source: PubMed Central journal article supplement (PMC4575867)
Supplement: NIHMS714133-supplement-1.pdf [file NIHMS714133-supplement-1.pdf]

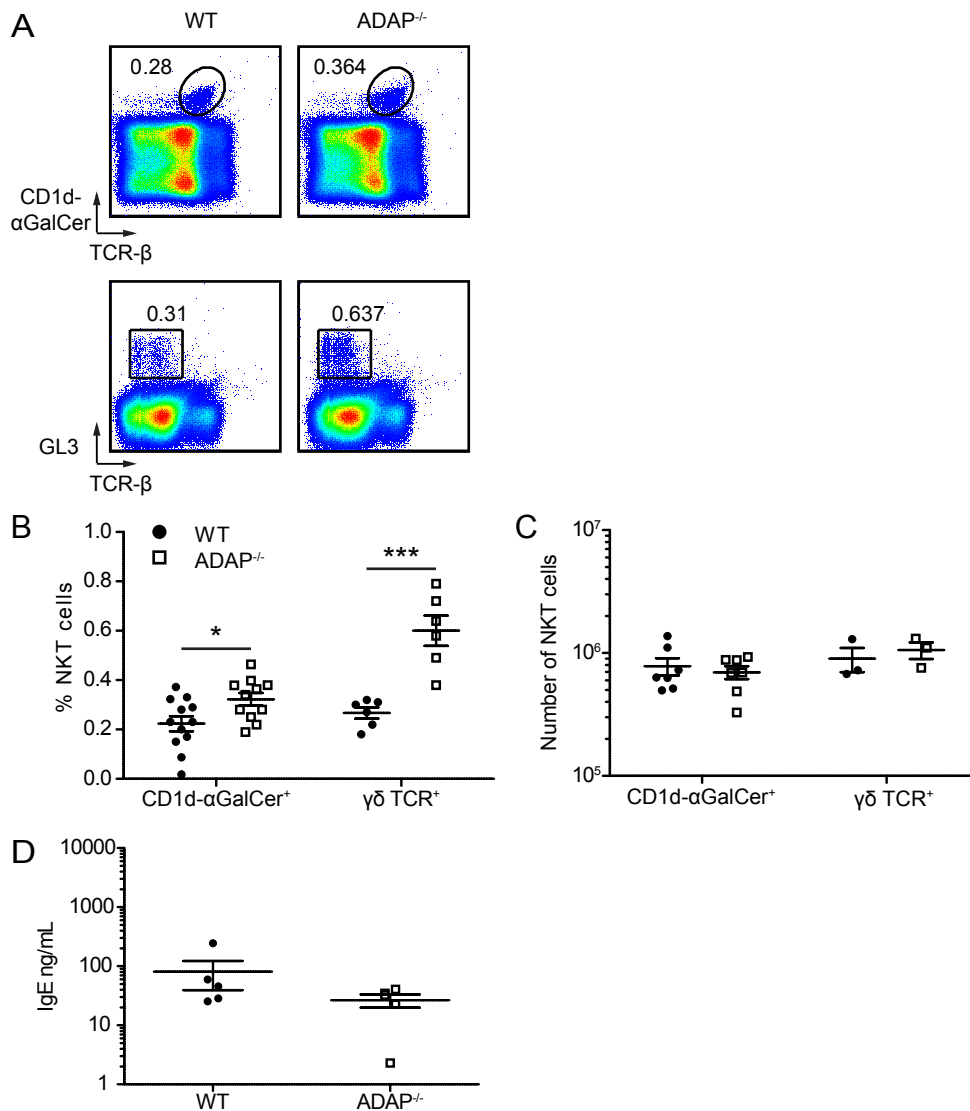

**Supplemental Figure 1:** Loss of ADAP does not enhance NKT mediated generation of CD8 MP T cells in the thymus. Cells from thymocytes were obtained from WT and ADAP<sup>-/-</sup> mice and stained for NKT cells. **(A)** NKT staining from WT (left) and ADAP<sup>-/-</sup> (right) thymi. Numbers represent the percentage of cells NKT cells either CD1d- $\alpha$ GalCer<sup>+</sup> TCR- $\beta$ <sup>int</sup> (top) or GL3<sup>+</sup> TCR- $\beta$ <sup>lo</sup> (bottom). **(B)** The percentage or **(C)** number of NKT cells of total thymocytes in WT (black circles) or ADAP<sup>-/-</sup> (open squares) mice. **(D)** Serum IgE from the blood of aged (25-40 week) mice. The results **(B)** and **(C)** are compiled from at least three independent experiments ( $\pm$  SEM).
